# Supplementary material for: Temperature and rhodamine B sensing based on fluorescence intensity ratio of Er3+ upconversion emissions
Source: Royal Society of Chemistry journal article supplement (doi:10.1039/c7ra09977k), 2017-01-01
Supplement: c7ra09977k1.pdf [file c7ra09977k1.pdf]

## Supplementary material

### Temperature and rhodamine B sensing based on fluorescence intensity ratio of Er<sup>3+</sup> upconversion emissions

Jin L. Wu,<sup>a</sup> Bao S. Cao,<sup>\*a,b</sup> Luis Rino,<sup>b</sup> Yang Y. He,<sup>a</sup> Zhi Q. Feng<sup>a</sup> and Bin Dong<sup>\*a</sup>

<sup>a</sup> Key Laboratory of Photosensitive Material and Device of Liaoning Province, Key Laboratory of New Energy and Rare Earth Resource Utilization of State Ethnic Affairs Commission & School of Physics and Materials Engineering, Dalian Minzu University, Dalian 116600, P. R. China. E-mail: bscao@dlmu.edu.cn, dong@dlmu.edu.cn

<sup>b</sup> Department of Physics & I3N, University of Aveiro, Campus Universitário de Santiago, Aveiro 3810-193, Portugal

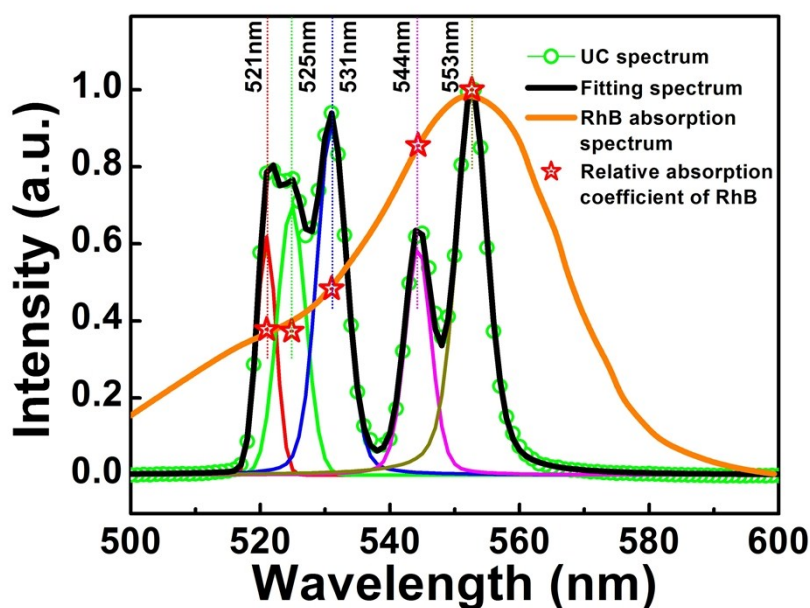

Fig. S1. Peak fitting of the green UC emission spectrum of the Ag/ZnO/Er<sup>3+</sup>:YbMoO<sub>4</sub> composite film. The UC spectrum can be well fitted by the Stark split at the wavelengths of 521, 525, 531, 544, and 553 nm. The normalized RhB absorption spectrum (orange line) is presented for comparison. The asterisks calculated by Eq. (6) denote the relative RhB absorption coefficients for the above five wavelengths. The calculated RhB absorption coefficients fit well with the RhB absorption spectrum.

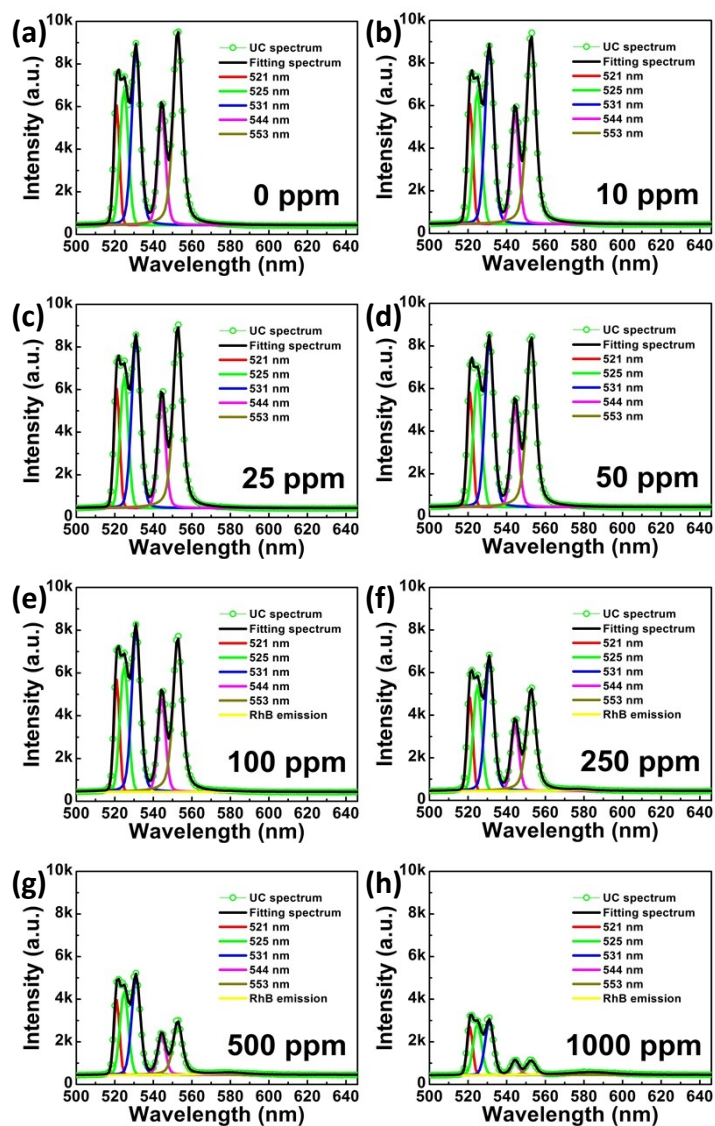

Fig. S2. Peak fitting of the fluorescence spectra of the composite film at different RhB concentration. The fluorescence spectra can be well fitted by the Stark split at the wavelengths of 521, 525, 531, 544, 553 nm and the RhB emission. Note that there is no fitting of the RhB emission at low concentration (<100 ppm).

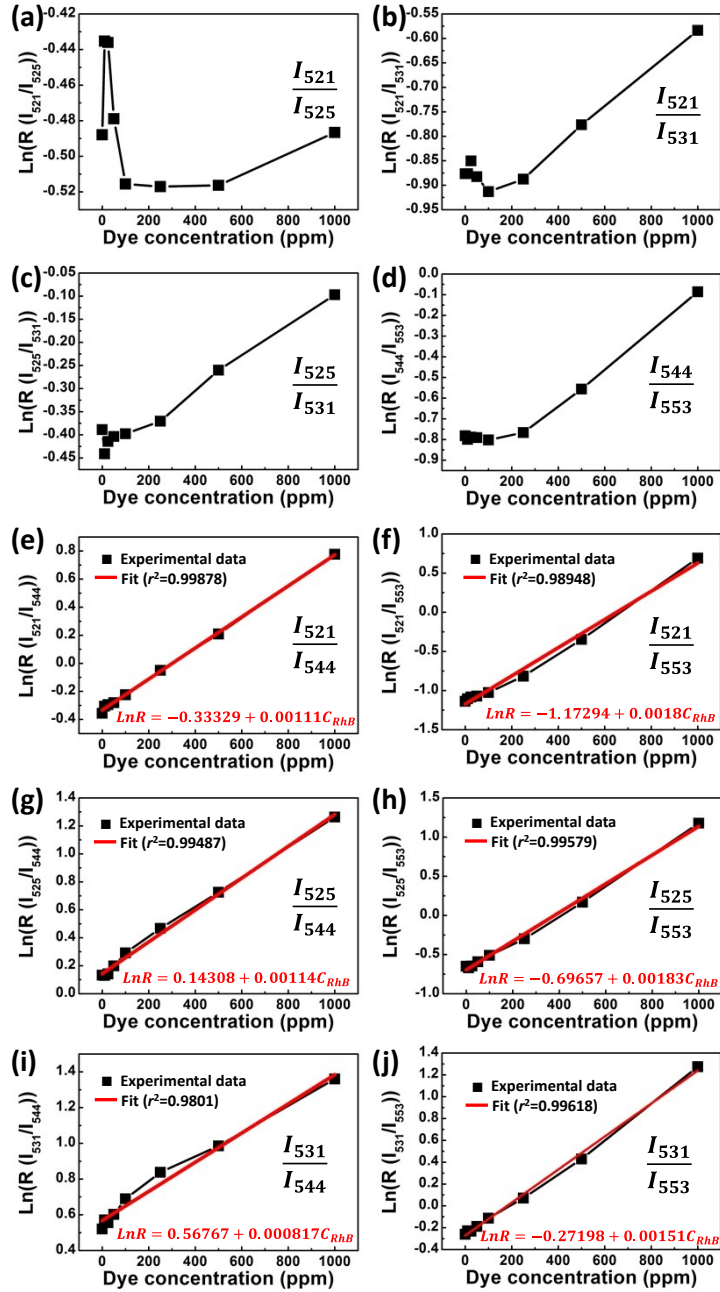

Fig. S3. Monolog plots of the FIR of the two different Stark green UC emissions as a function of the RhB concentration. For the two Stark emissions with larger  $\Delta K$  (e-j), there is a linear relationship between  $\text{Ln}R$  and the RhB concentration.

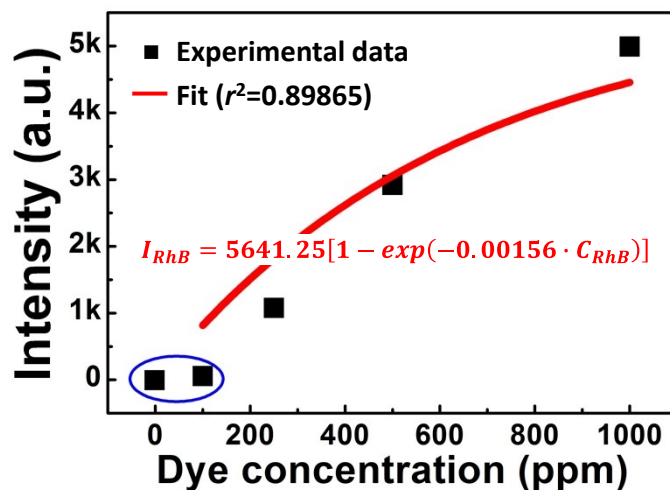

Fig. S4. RhB emission intensity as a function of the RhB concentration. The RhB emission intensity is fitted with the equation of  $I_{RhB} = \Phi I_0 [1 - \exp(-2.303KlC_{RhB})]$ , where  $I_{RhB}$  is the RhB emission intensity at the concentration of  $C_{RhB}$ ,  $I_0$  is the initial intensity of the green UC emission,  $\Phi$  is the fluorescence efficiency,  $K$  and  $l$  are the average absorption coefficient of RhB and the optical length, respectively. The fitting of  $\Phi$  is about 2.82% indicating the low fluorescence efficiency of RhB caused by the RET process. Both the large fitting error ( $r^2=0.89865$ ) and the unmeasurable RhB emissions at lower concentration (blue circle) indicate that it is unsuitable for the RhB sensing based on the RhB emissions in this work.
